# Supplementary material for: Pangenome-based genome inference using integer programming
Source: HighWire-hosted journal article supplement (doi:10.1101/gr.280567.125), 2025-08-21
Supplement: Supplemental_Material.pdf [file Supplemental_Material.pdf]

# Supplementary Material for “Integer programming framework for pangenome-based genome inference”

## S1 Path Inference Problem is NP-hard

**Proof for Theorem 1.** We begin with an instance  $G_H(V_H, E_H)$  of the Hamiltonian Path Problem. Let  $V_H = \{u_1, \dots, u_n\}$ . We first create a graph  $G' = (V', E')$  where

$$V' = \{s\} \cup \{u_k^i \mid 1 \leq k \leq n, 1 \leq i \leq n\} \cup \{t\}$$

$$E' = \{(s, u_k^1) \mid 1 \leq k \leq n\} \cup \{(u_k^i, u_h^{i+1}) \mid (u_k, u_h) \in E_H, 1 \leq i < n\} \cup \{(u_k^n, t) \mid 1 \leq k \leq n\}$$

For  $1 \leq x \leq n + 2(c(n + 1) + 1)$ , let  $\text{bin}(x)$  be standard binary encoding of  $x$  using  $b = \lceil \log_2(n + 2(c(n + 1) + 1)) \rceil + 1$  bits. We assign the vertex labels

$$\sigma(u_k^i) = \text{bin}(k) \circ 0^b 1 \quad \text{for } 1 \leq i \leq n, 1 \leq k \leq n$$

$$\sigma(s) = \text{bin}(n + 1) \circ 0^b 1 \circ \text{bin}(n + 2) \circ 0^b 1 \circ \dots \circ \text{bin}(n + c(n + 1) + 1) \circ 0^b 1$$

$$\sigma(t) = \text{bin}(n + c(n + 1) + 1 + 1) \circ 0^b 1 \circ \text{bin}(n + c(n + 1) + 1 + 2) \circ 0^b 1 \circ \text{bin}(n + 2(c(n + 1) + 1)) \circ 0^b 1.$$

We create a distinct haplotype path for each edge that supports only that edge. We define the set of strings  $\mathcal{S} = \{\text{bin}(1) \circ 0^b 1, \text{bin}(2) \circ 0^b 1, \dots, \text{bin}(n + 2(c(n + 1) + 1)) \circ 0^b 1\}$ . See Figure S1 in Appendix for a small worked example. The reduction presented above clearly runs in polynomial time for  $c = |V|^{\Theta(1)}$ . Combined with Lemmas 3 and 4, Theorem 1 follows.

**Lemma 3.** *If  $G_H$  contains a Hamiltonian path, then  $G'$  has an inferred path  $\mathcal{P}$  with  $\text{Cost}(\mathcal{P}) = c \cdot (n + 1)$ .*

*Proof.* Let  $u_{i_1}, \dots, u_{i_n}$  be a Hamiltonian path in  $G_H$ . We take as our inferred path  $\mathcal{P} = s, u_{i_1}^1, u_{i_2}^2, \dots, u_{i_n}^n, t$ . As every edge has its own corresponding haplotype, the number of recombinations is  $n + 1$ . Furthermore, since  $u_{i_1}, \dots, u_{i_n}$  is a Hamiltonian path and  $s$  and  $t$  are included in the inferred path, all strings in  $\mathcal{S}$  occur in  $\sigma(\mathcal{P})$ . Hence, the total cost is  $c \cdot (n + 1)$ .  $\square$

**Lemma 4.** *If  $G'$  has an inferred path  $\mathcal{P}$  with  $\text{Cost}(\mathcal{P}) \leq c \cdot (n + 1)$ , then  $G_H$  has a Hamiltonian path.*

*Proof.* First, we claim that  $s$  and  $t$  must be included in  $\mathcal{P}$ . The  $0^b 1$  substrings are used as padding to prevent any string in  $\mathcal{S}$  from being matched using portions of two or more vertex labels. Therefore, if  $s$  or  $t$  are not

included in the inferred path, at least  $c \cdot (n + 1) + 1$  strings from  $\mathcal{S}$  do not occur in  $\sigma(\mathcal{P})$ , contradicting that  $Cost(\mathcal{P}) \leq c \cdot (n + 1)$ . Hence, the inferred path  $\mathcal{P}$  must contain  $s$  and  $t$  and be of the form  $s, u_{i_1}^1, \dots, u_{i_n}^n, t$  for some  $i_1, \dots, i_n$ . Since each edge traversed corresponds to a recombination, the total number of recombinations is  $n + 1$ . The only way the  $Cost(\mathcal{P}) \leq c \cdot (n + 1)$  is if all strings in  $\mathcal{S}$  occur as substrings in  $\sigma(\mathcal{P})$ . Again, due to the  $0^b1$  padding in the vertex labels, this can only happen if for all  $i \in [1, n]$ ,  $u_i^k$  is a vertex in  $\mathcal{P}$  for some  $k$ . Furthermore, because there are  $n$  vertices in  $\mathcal{P}$  that are not  $s$  or  $t$ , there must be exactly one such  $k$  for a given  $i$ . We conclude that  $u_{i_1}, \dots, u_{i_n}$  is a Hamiltonian path in  $G_H$ .  $\square$

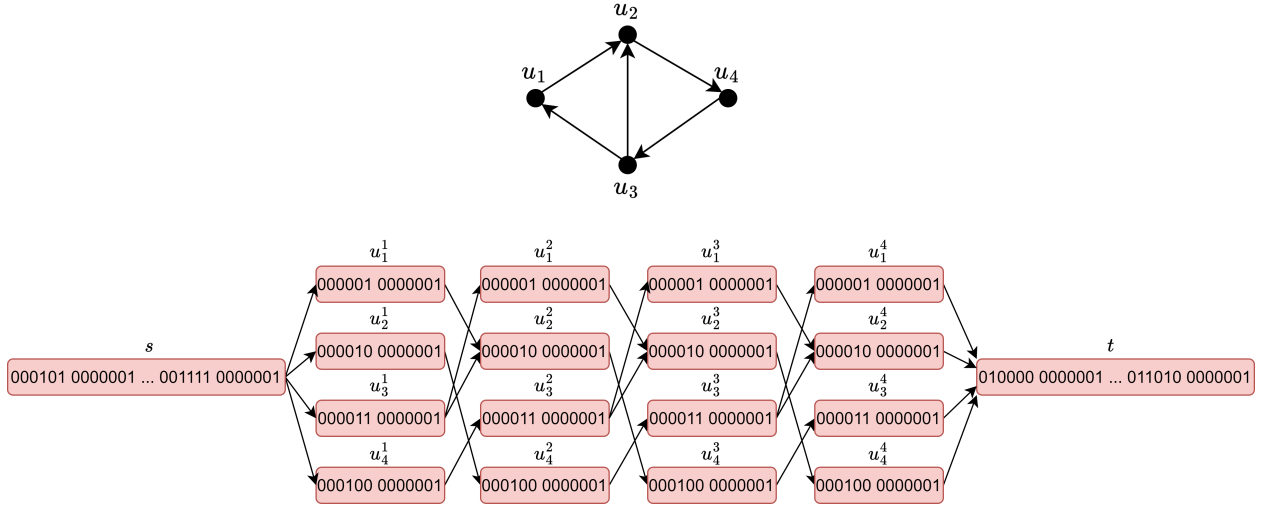

Fig.S1: A small example of our reduction from Hamiltonian Path Problem to Problem 1 (Theorem 1). (Top) The starting instance of  $G$  of Hamiltonian Path Problem. (Bottom) The vertex labeled graph  $G'$  constructed from  $G$ . Here,  $n = 4$  and we assume  $c = 2$ , making  $b = \lceil \log_2(n + 2(c(n + 1) + 1)) \rceil + 1 = 6$ . Each edge is supported by a unique haplotype (not shown). The string set is  $\mathcal{S} = \{0000010000001, 0000100000001, \dots, 0110100000001\}$ .

Table S1: Additional information about the MHC sequences of five haplotypes (APD, DBB, MANN, QBL, SSTO). We show the length of the complete assembly in the second column. The third and forth columns show edit distance statistics between the assembly and 49 reference haplotypes included in the pangenome reference. In the last two columns, we list the SRA accession numbers and coverage of short-read sequencing datasets.

| Haplotype | Assembly length<br>(Mbp) | Edit distance with<br>pangenome reference haplotypes |         | Short-read data |          |
|-----------|--------------------------|------------------------------------------------------|---------|-----------------|----------|
|           |                          | Mean                                                 | Minimum | SRA Accession   | Coverage |
| APD       | 4.93                     | 146,423                                              | 37,102  | SRR17272303     | 16.26x   |
| DBB       | 5.05                     | 174,619                                              | 10,380  | SRR17272302     | 12.91x   |
| MANN      | 5.03                     | 189,464                                              | 58,168  | SRR17272301     | 18.20x   |
| QBL       | 4.90                     | 159,968                                              | 72,293  | SRR17272300     | 12.85x   |
| SSTO      | 5.05                     | 161,044                                              | 35,583  | SRR17272299     | 15.04x   |

Table S2: Commands used for running various tools

| <b>Haplotype/Genotype Imputation</b>                        |                                                                                                                                                                                                                                                            |
|-------------------------------------------------------------|------------------------------------------------------------------------------------------------------------------------------------------------------------------------------------------------------------------------------------------------------------|
| PHI                                                         | 1) vcf2gfa.py -v multi-allelic_phased.vcf -r reference<br>.fa > graph.gfa<br>2) PHI -t32 -g graph.gfa -r reads.fq -o imputed_hap.fa                                                                                                                        |
| PanGenie                                                    | PanGenie -t32 -i reads.fq -r reference.fa -v multi-<br>allelic_phased.vcf -o out_vcf_PG                                                                                                                                                                    |
| VG                                                          | 1) kmc -t32 -k29 -m128 -okff -hp reads.fq sample<br>tmp_dir<br>2) vg haplotypes -t32 -v2 --num-haplotypes 1 -i input.<br>hapl -k sample.kff -g sample_graph.gbz input_graph.gbz<br>3) vg paths -x sample_graph.gbz -F -S recombination ><br>imputed_hap.fa |
| <b>VCF Operations</b>                                       |                                                                                                                                                                                                                                                            |
| Transform VCF to have<br>non-overlapping variants           | vcfbub -l 0 -r 100000 -i input.vcf > output.vcf                                                                                                                                                                                                            |
| Filter heterozygous<br>variants                             | bcftools view -i 'GT="hom"' input.vcf.gz > output.vcf                                                                                                                                                                                                      |
| Generate haplotype from<br>reference genome and VCF<br>file | bcftools consensus -f reference.fa -o imputed_hap.fa<br>input.vcf.gz                                                                                                                                                                                       |
| <b>Evaluation</b>                                           |                                                                                                                                                                                                                                                            |
| Edit distance                                               | edlib-aligner ground-truth_hap.fa imputed_hap.fa                                                                                                                                                                                                           |

Table S3: Count of homozygous and heterozygous genotype calls made by PanGenie. In our benchmark, we excluded the heterozygous calls because the sequencing datasets were derived from homozygous cell lines.

| Coverage      | APD    |       | DBB    |       | MANN   |       | QBL    |       | SSTO   |       |
|---------------|--------|-------|--------|-------|--------|-------|--------|-------|--------|-------|
|               | Hom    | Het   |
| 0.1x          | 52,816 | 6,245 | 51,435 | 7,626 | 52,452 | 6,609 | 53,707 | 5,354 | 53,893 | 5,168 |
| 0.5x          | 56,249 | 2,812 | 55,845 | 3,216 | 56,258 | 2,803 | 56,447 | 2,614 | 56,064 | 2,997 |
| 1x            | 57,448 | 1,613 | 57,010 | 2,051 | 57,064 | 1,997 | 57,224 | 1,837 | 57,099 | 1,962 |
| 2x            | 58,201 | 860   | 57,948 | 1,113 | 58,334 | 727   | 58,101 | 960   | 58,397 | 664   |
| 5x            | 58,552 | 509   | 58,382 | 679   | 58,601 | 460   | 58,340 | 721   | 58,228 | 833   |
| 10x           | 58,533 | 528   | 58,478 | 583   | 58,188 | 873   | 58,343 | 718   | 58,337 | 724   |
| Complete data | 58,647 | 414   | 58,457 | 604   | 58,592 | 469   | 58,457 | 604   | 58,521 | 540   |

Table S4: We report additional performance statistics for PHI on all our datasets. We specify the number of recombinations used in the solution in the second column. Next, we mention the runtime and memory usage of PHI. In the fifth and the sixth columns, we specify edit distance and alignment identity between the output MHC sequence and the ground-truth sequence. Alignment identity is defined as the ratio of the number of character matches divided by the length of the alignment. In the last three columns, we give statistics about the minimizers computed from sequencing reads. We give the count of distinct minimizers observed in the read set. A fraction of minimizers would be absent from the graph, and some fraction would be present in all reference haplotypes, making them ‘uninformative’. The matches of only the remaining fraction minimizers are useful while solving the optimization problem.

| Coverage        | Recombinations | Time<br>(s) | Memory<br>(GB) | Edit<br>distance | Alignment<br>identity (%) | Minimizers<br>(Reads) | Minimizers<br>% Absent   % Uninformative |       |
|-----------------|----------------|-------------|----------------|------------------|---------------------------|-----------------------|------------------------------------------|-------|
| Haplotype: APD  |                |             |                |                  |                           |                       |                                          |       |
| 0.1×            | 3              | 1840        | 72             | 7551             | 99.85                     | 33248                 | 36.33                                    | 43.12 |
| 0.5×            | 7              | 1294        | 84             | 2272             | 99.95                     | 156209                | 37.90                                    | 41.42 |
| 1×              | 7              | 2338        | 93             | 2220             | 99.95                     | 289795                | 41.46                                    | 39.19 |
| 2×              | 9              | 2702        | 108            | 1948             | 99.96                     | 508720                | 46.47                                    | 35.84 |
| 5×              | 10             | 4671        | 125            | 1779             | 99.96                     | 984355                | 59.39                                    | 27.05 |
| 10×             | 10             | 3683        | 134            | 1810             | 99.96                     | 1599325               | 72.22                                    | 18.33 |
| 16.26×          | 10             | 4536        | 134            | 1810             | 99.96                     | 2288126               | 80.17                                    | 13.00 |
| Haplotype: DBB  |                |             |                |                  |                           |                       |                                          |       |
| 0.1×            | 2              | 1604        | 70             | 2191             | 99.96                     | 33901                 | 37.28                                    | 41.78 |
| 0.5×            | 4              | 1467        | 83             | 1415             | 99.97                     | 157510                | 39.66                                    | 39.60 |
| 1×              | 4              | 2022        | 92             | 1496             | 99.97                     | 293996                | 42.54                                    | 37.84 |
| 2×              | 4              | 2502        | 108            | 1472             | 99.97                     | 518085                | 47.59                                    | 34.28 |
| 5×              | 4              | 4175        | 126            | 1385             | 99.97                     | 1015730               | 60.37                                    | 25.75 |
| 10×             | 4              | 4525        | 132            | 1377             | 99.97                     | 1660305               | 72.79                                    | 17.55 |
| 12.91×          | 4              | 4743        | 135            | 1377             | 99.97                     | 2028107               | 77.31                                    | 14.58 |
| Haplotype: MANN |                |             |                |                  |                           |                       |                                          |       |
| 0.1×            | 3              | 1680        | 67             | 41028            | 99.19                     | 33614                 | 34.31                                    | 43.07 |
| 0.5×            | 7              | 1658        | 85             | 38379            | 99.24                     | 153933                | 36.66                                    | 41.50 |
| 1×              | 8              | 2183        | 94             | 37898            | 99.25                     | 288713                | 39.33                                    | 39.76 |
| 2×              | 9              | 3054        | 109            | 37728            | 99.25                     | 502336                | 44.89                                    | 36.22 |
| 5×              | 12             | 3774        | 126            | 36263            | 99.28                     | 964364                | 57.71                                    | 27.55 |
| 10×             | 14             | 5426        | 132            | 35941            | 99.29                     | 1553694               | 70.85                                    | 18.86 |
| 18.20×          | 14             | 4843        | 134            | 35940            | 99.29                     | 2450244               | 81.06                                    | 12.15 |
| Haplotype: QBL  |                |             |                |                  |                           |                       |                                          |       |
| 0.1×            | 3              | 2222        | 88             | 15062            | 99.69                     | 32464                 | 35.13                                    | 43.05 |
| 0.5×            | 9              | 1236        | 81             | 7829             | 99.84                     | 153818                | 37.47                                    | 41.77 |
| 1×              | 10             | 2388        | 92             | 4610             | 99.91                     | 284587                | 39.92                                    | 40.35 |
| 2×              | 14             | 2981        | 109            | 3561             | 99.93                     | 502087                | 46.98                                    | 36.14 |
| 5×              | 17             | 3986        | 123            | 3349             | 99.93                     | 966151                | 58.80                                    | 27.40 |
| 10×             | 17             | 4049        | 129            | 3356             | 99.93                     | 1566636               | 71.76                                    | 18.63 |
| 12.85×          | 17             | 4113        | 131            | 3343             | 99.93                     | 1862566               | 75.90                                    | 15.84 |
| Haplotype: SSTO |                |             |                |                  |                           |                       |                                          |       |
| 0.1×            | 2              | 2013        | 72             | 17626            | 99.65                     | 33792                 | 36.06                                    | 41.98 |
| 0.5×            | 12             | 1812        | 84             | 10471            | 99.79                     | 156473                | 37.60                                    | 41.12 |
| 1×              | 20             | 2536        | 93             | 5150             | 99.90                     | 291484                | 41.05                                    | 38.59 |
| 2×              | 24             | 2977        | 108            | 4671             | 99.91                     | 513683                | 46.50                                    | 35.02 |
| 5×              | 24             | 5023        | 124            | 4611             | 99.91                     | 992511                | 59.01                                    | 26.68 |
| 10×             | 24             | 5021        | 132            | 4634             | 99.91                     | 1609715               | 71.88                                    | 18.16 |
| 15.04×          | 24             | 4499        | 137            | 4637             | 99.91                     | 2206289               | 79.07                                    | 13.44 |

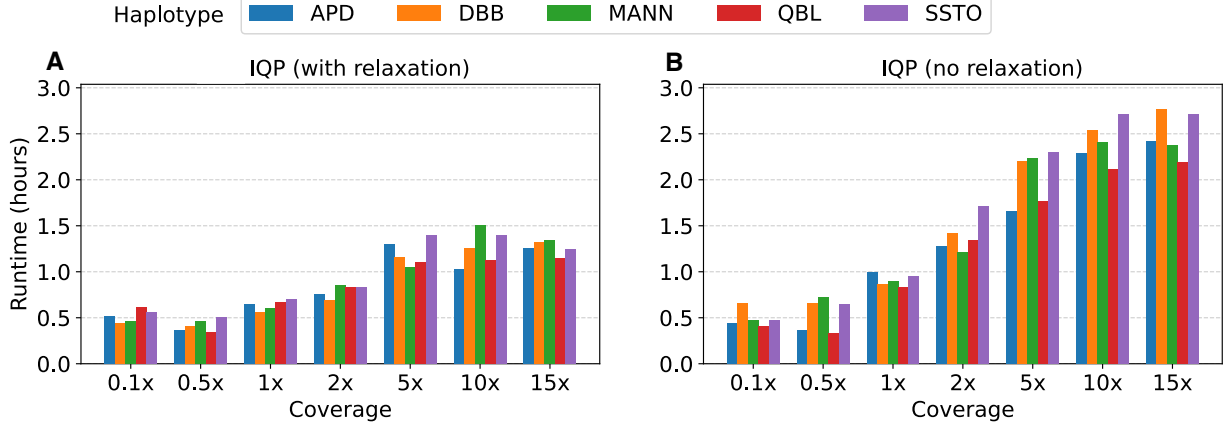

Fig. S2: Evaluation of the performance of the IQP method with and without relaxation of the binary edge variables  $x_{uv}$ . We compared runtime using various short-read datasets.

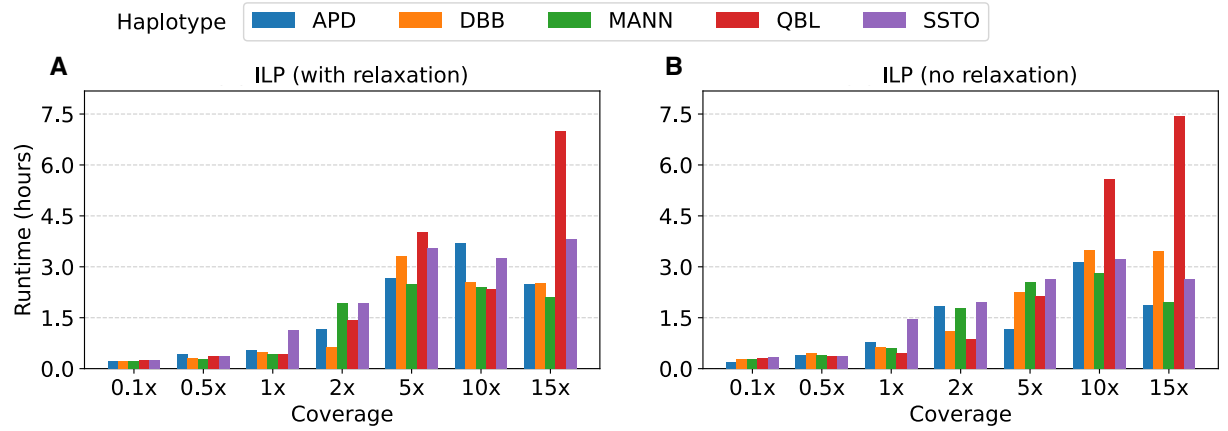

Fig. S3: Evaluation of the performance of the ILP method with and without relaxation of the binary edge variables  $x_{uv}$ . We compared runtime using various short-read datasets.
